# Supplementary material for: Investigating the Antibacterial Properties of Prospective Scabicides
Source: MDPI journal article supplement (doi:10.3390/biomedicines10123287), 2022-12-19
Supplement: s1 [file s1]

# Investigating the Antibacterial Properties of Prospective Scabicides

Sara Taylor, Deonne Walther, Kylie Agnew-Francis, Deepani D. Fernando, Pearl Swe-Kay, Sharon Chow, Craig Williams and Katja Fischer

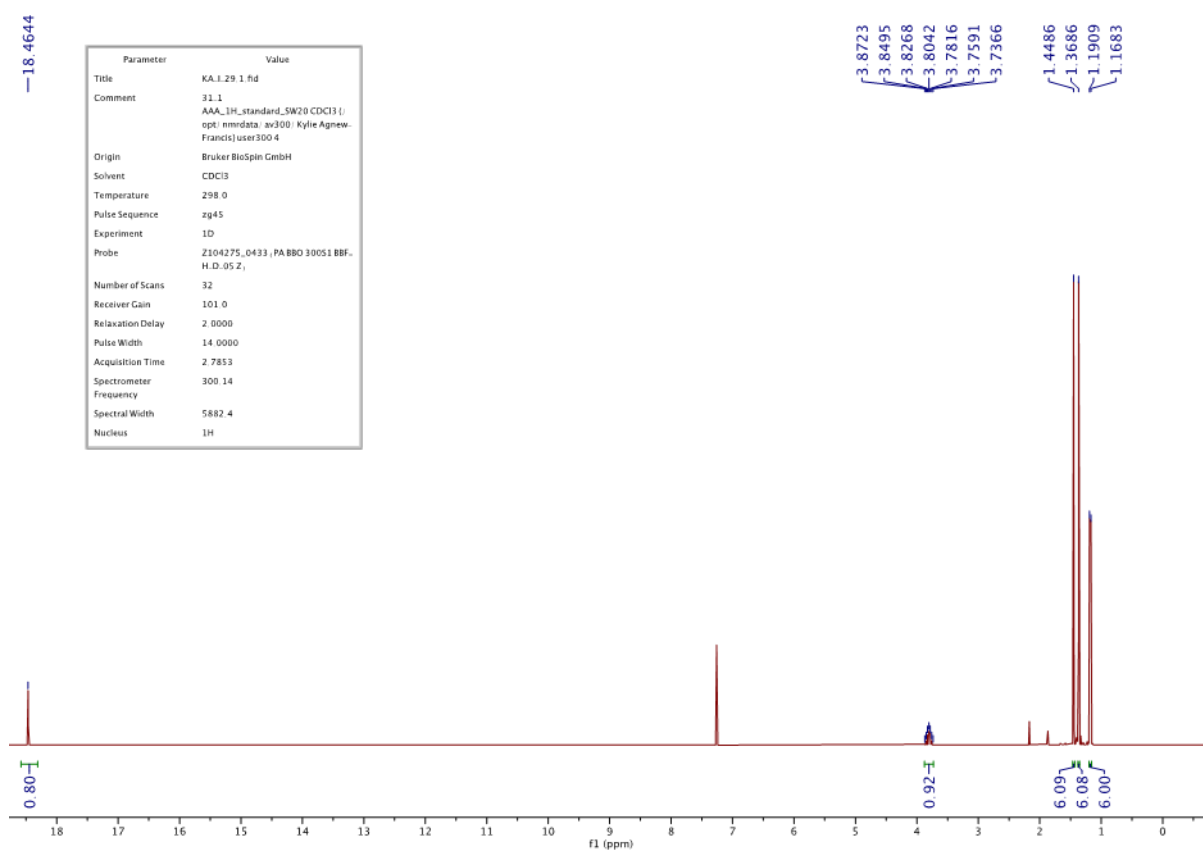

Figure S1.  $^1\text{H}$  NMR of Flavesone.

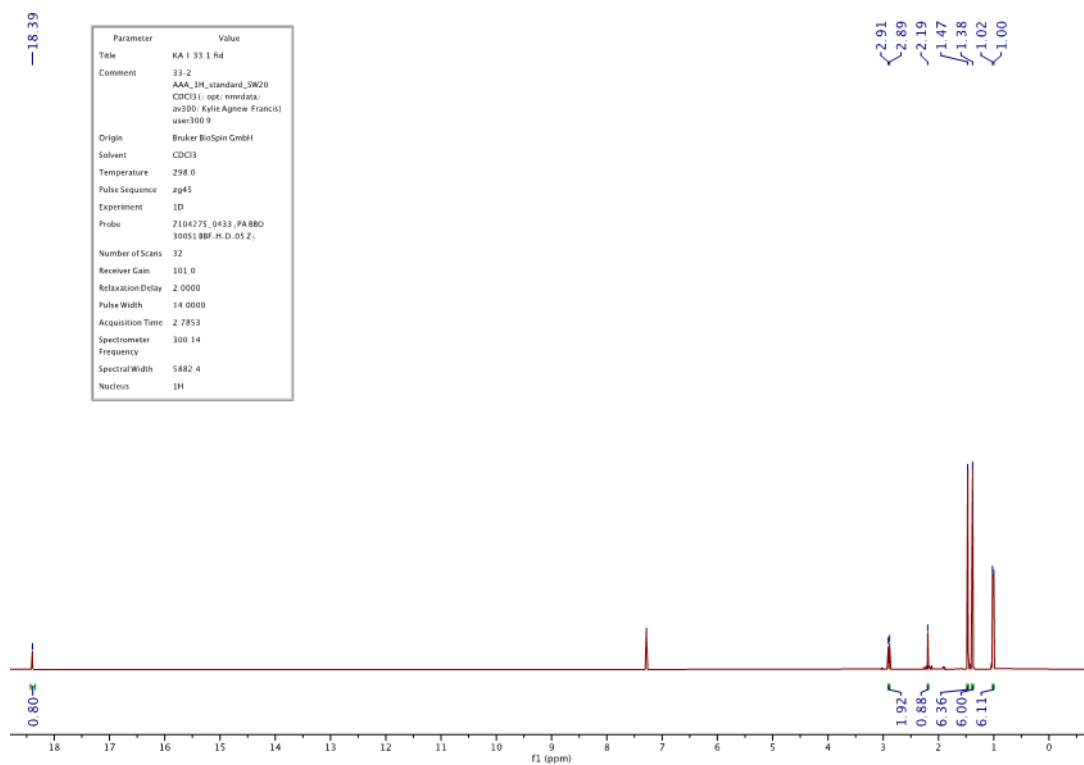

Figure S2. <sup>1</sup>H NMR of Leptospermonone.

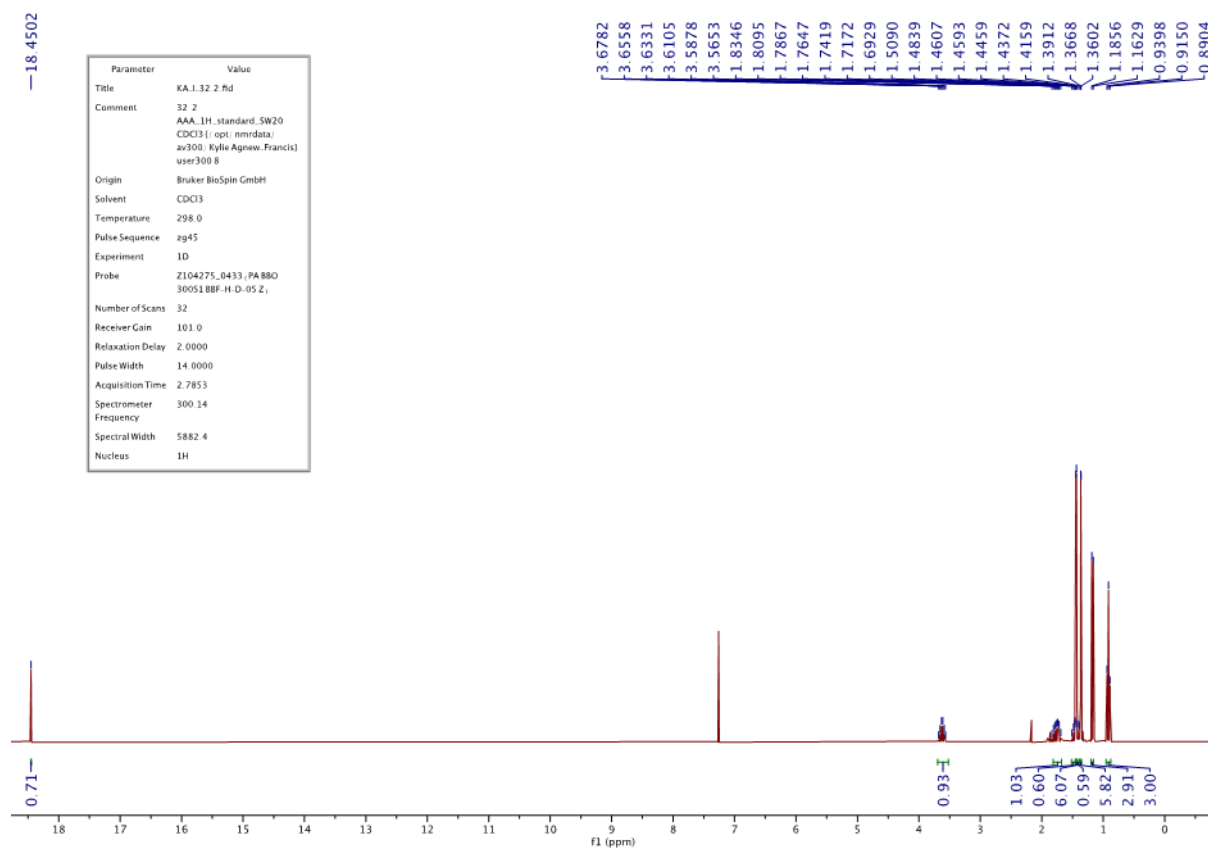

Figure S3. <sup>1</sup>H NMR of Isoleptospermonone.

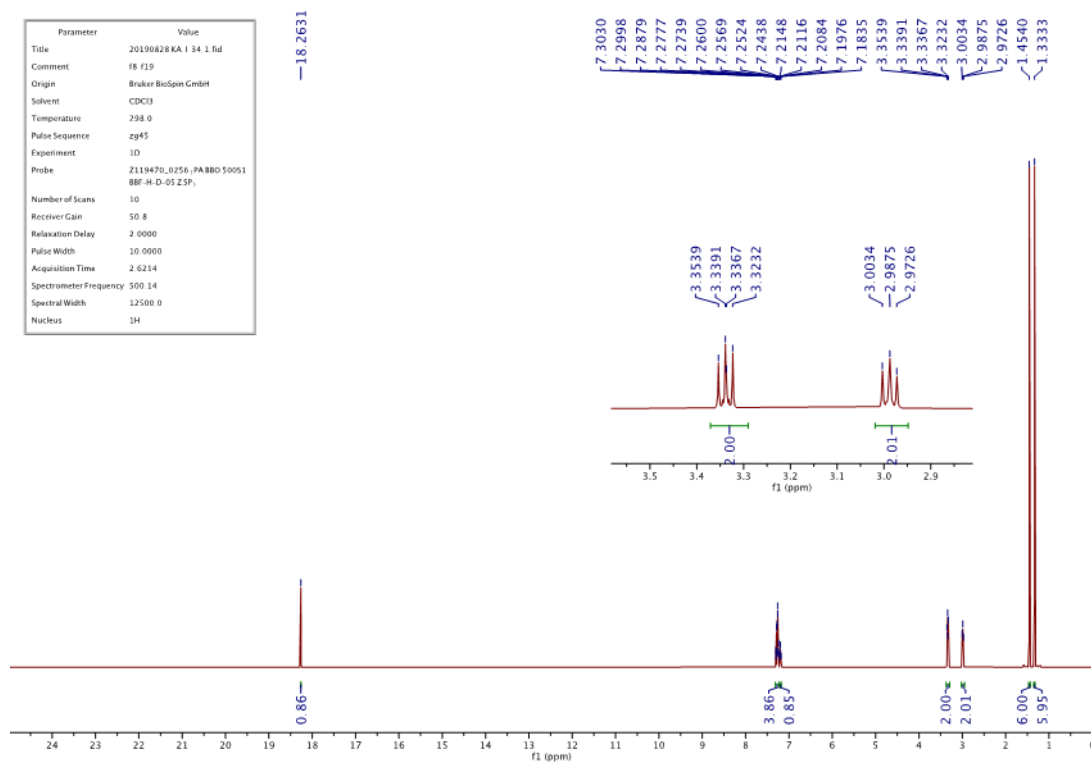

Figure S4. <sup>1</sup>H NMR of Grandiflorone.

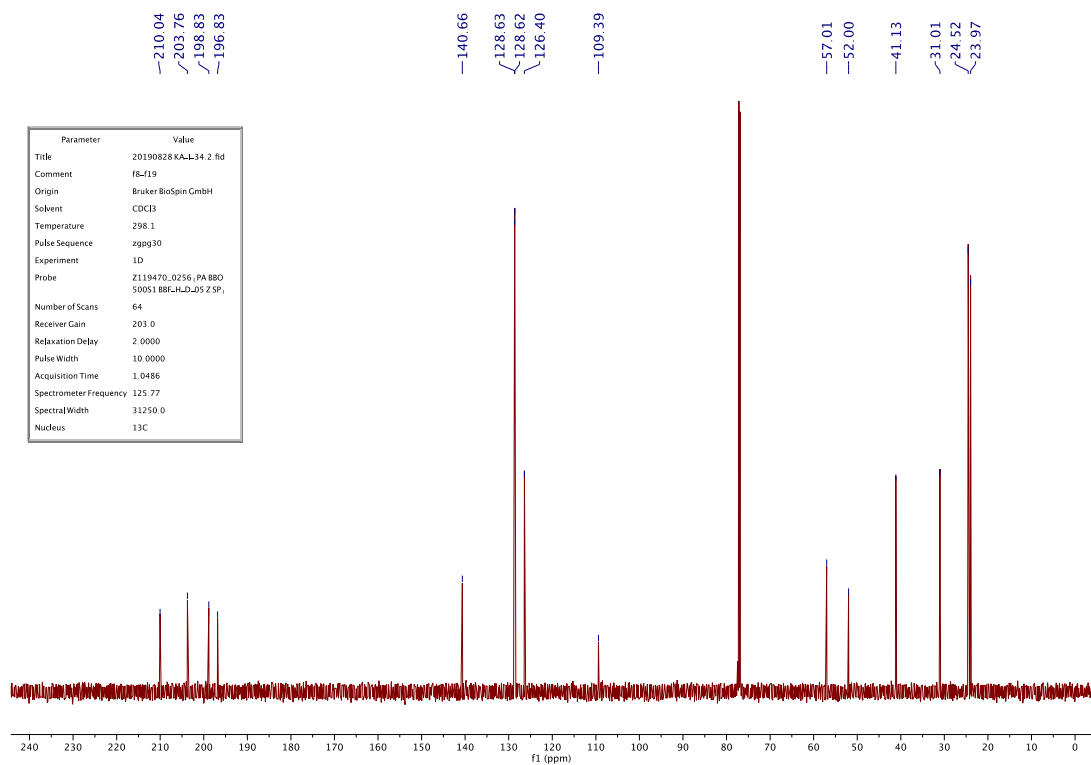

Figure S5. <sup>13</sup>C NMR of Grandiflorone.

Table S1. Vehicle controls and antibiotic controls.

|                           | <i>A.baumannii</i><br>ATCC19606 |         | <i>A.baumannii</i><br>ATCC17978 |              | <i>A.baumannii</i><br>BAA1605 |             | <i>S. aureus</i><br>XEN29<br>NCTC8532 |         | <i>S. aureus</i><br>MSSA CC75<br>M5 |         | <i>S. aureus</i><br>MRSA CC75<br>M34 |         | <i>S. pyogenes</i><br>2031 |         | <i>S. pyogenes</i><br>2967 |         | <i>S. pyogenes</i><br>8830 |         | <i>S. dysgalactiae</i><br>MD10 |         | <i>S. dysgalactiae</i><br>ns3396 |         |
|---------------------------|---------------------------------|---------|---------------------------------|--------------|-------------------------------|-------------|---------------------------------------|---------|-------------------------------------|---------|--------------------------------------|---------|----------------------------|---------|----------------------------|---------|----------------------------|---------|--------------------------------|---------|----------------------------------|---------|
|                           | MIC                             | MBC     | MIC                             | MBC          | MIC                           | MBC         | MIC                                   | MBC     | MIC                                 | MBC     | MIC                                  | MBC     | MIC                        | MBC     | MIC                        | MBC     | MIC                        | MBC     | MIC                            | MBC     | MIC                              | MBC     |
|                           | (% v/v)                         | (% v/v) | (% v/v)                         | (% v/v)      | (% v/v)                       | (% v/v)     | (% v/v)                               | (% v/v) | (% v/v)                             | (% v/v) | (% v/v)                              | (% v/v) | (% v/v)                    | (% v/v) | (% v/v)                    | (% v/v) | (% v/v)                    | (% v/v) | (% v/v)                        | (% v/v) | (% v/v)                          | (% v/v) |
| DMSO                      | 12.5 ±0                         | 25 ±0   | 12.5 ±0                         | 25 ±0        | 12.5 ±0                       | 25 ±0       | 12.5 ±0                               | 25 ±0   | 12.5 ±0                             | 25 ±0   | 12.5 ±0                              | 25 ±0   | 12.5 ±0                    | 25 ±0   | 12.5 ±0                    | 25 ±0   | 12.5 ±0                    | 25 ±0   | 12.5 ±0                        | 25 ±0   | 12.5 ±0                          | 25 ±0   |
| Isopropanol               | 6.25 ±0                         | 12.5 ±0 | 6.25 ±0                         | 12.5 ±0      | 6.25 ±0                       | 12.5 ±0     | 12.5 ±0                               | 25 ±0   | 12.5 ±0                             | 25 ±0   | 12.5 ±0                              | 25 ±0   | n/a                        | n/a     | n/a                        | n/a     | n/a                        | n/a     | n/a                            | n/a     | n/a                              | n/a     |
|                           | MIC                             | MBC     | MIC                             | MBC          | MIC                           | MBC         | MIC                                   | MBC     | MIC                                 | MBC     | MIC                                  | MBC     | MIC                        | MBC     | MIC                        | MBC     | MIC                        | MBC     | MIC                            | MBC     | MIC                              | MBC     |
|                           | (µg/ml)                         | (µg/ml) | (µg/ml)                         | (µg/ml)      | (µg/ml)                       | (µg/ml)     | (µg/ml)                               | (µg/ml) | (µg/ml)                             | (µg/ml) | (µg/ml)                              | (µg/ml) | (µg/ml)                    | (µg/ml) | (µg/ml)                    | (µg/ml) | (µg/ml)                    | (µg/ml) | (µg/ml)                        | (µg/ml) | (µg/ml)                          | (µg/ml) |
| Ampicillin                | n/a                             | n/a     | n/a                             | n/a          | n/a                           | n/a         | 1.2                                   | 1.2     | 1.2                                 | 1.2     | 13.3 ±5                              | 32 ±9.6 | 1.2                        | 1.2     | 1.2                        | 1.2     | 1.2                        | 2.4 ±0  | 1.2                            | 1.2     | 1.2                              | 1.2     |
| Ampicillin +<br>Sulbactam | 12                              | 19.2 ±0 | 4 ±1                            | 14.4<br>±5.3 | 39                            | 153.6<br>±0 | n/a                                   | n/a     | n/a                                 | n/a     | n/a                                  | n/a     | n/a                        | n/a     | n/a                        | n/a     | n/a                        | n/a     | n/a                            | n/a     | n/a                              | n/a     |
